# Supplementary material for: Anthropometric measures and HbA1c to detect dysglycemia in young Asian women planning conception: The S-PRESTO cohort
Source: PubMed Central journal article supplement (PMC7280215; doi:10.1038/s41598-020-66147-x), 2020-06-08
Supplement: 41598_2020_66147_MOESM1_ESM.pdf [file 41598_2020_66147_MOESM1_ESM.pdf]

## **Anthropometric measures and HbA1c to detect dysglycemia in young Asian women planning conception: The S-PRESTO cohort**

Anne HY Chu<sup>1</sup>, Izzuddin M Aris<sup>1,2,3</sup>, Sharon Ng<sup>2</sup>, See Ling Loy<sup>4,5</sup>, Jonathan Y Bernard<sup>1,6</sup>, Mya Thway Tint<sup>1,2</sup>, Wen Lun Yuan<sup>7</sup>, Keith M Godfrey<sup>8</sup>, Jerry Kok Yen Chan<sup>4,5</sup>, Lynette Pei-Chi Shek<sup>1,7</sup>, Yap Seng Chong<sup>1,2</sup>, Kok Hian Tan<sup>5,9</sup>, Seng Bin Ang<sup>10</sup>, Heng Hao Tan<sup>4,5</sup>, Bernard SM Chern<sup>5,11</sup>, Fabian Yap<sup>12,13</sup>, Yung Seng Lee<sup>1,7</sup>, Ngee Lek<sup>5,13</sup>, Melvin Khee-Shing Leow<sup>1,5</sup>, Chin Meng Khoo<sup>14</sup>, Shiao-Yng Chan<sup>1,2\*</sup>

<sup>1</sup>Singapore Institute for Clinical Sciences (SICS), Agency for Science, Technology and Research (A\*STAR), Singapore

<sup>2</sup>Department of Obstetrics and Gynaecology, Yong Loo Lin School of Medicine, National University of Singapore, Singapore

<sup>3</sup>Division of Chronic Disease Research Across the Lifecourse, Department of Population Medicine, Harvard Medical School and Harvard Pilgrim Health Care Institute, Boston, Massachusetts, USA

<sup>4</sup>Department of Reproductive Medicine, KK Women's and Children Hospital, Singapore

<sup>5</sup>Duke-NUS Medical School, Singapore

<sup>6</sup>Centre for Research in Epidemiology and Statistics, Inserm, Villejuif, France

<sup>7</sup>Department of Paediatrics, Yong Loo Lin School of Medicine, National University of Singapore, Singapore

<sup>8</sup>MRC Lifecourse Epidemiology Unit and NIHR Southampton Biomedical Research Centre, University of Southampton and University Hospital Southampton NHS Foundation Trust, Southampton, UK

<sup>9</sup>Department of Maternal Fetal Medicine, KK Women's and Children's Hospital, Singapore

<sup>10</sup>Department of Family Medicine Service, KK Women's and Children's Hospital, Singapore

<sup>11</sup>Division of Obstetrics & Gynaecology, KK Women's and Children's Hospital, Singapore

<sup>12</sup>Lee Kong Chian School of Medicine, Nanyang Technological University, Singapore

<sup>13</sup>Department of Paediatrics, KK Women's and Children's Hospital, Singapore

<sup>14</sup>Department of Medicine, Yong Loo Lin School of Medicine, National University of Singapore, Singapore

### **Address reprints and correspondence to:**

\*Shiao-Yng Chan. Department of Obstetrics and Gynaecology, Yong Loo Lin School of Medicine, National University of Singapore. NUHS Tower Block Level 12, 1E Kent Ridge Road, Singapore 119228. Email: [obgchan@nus.edu.sg](mailto:obgchan@nus.edu.sg)

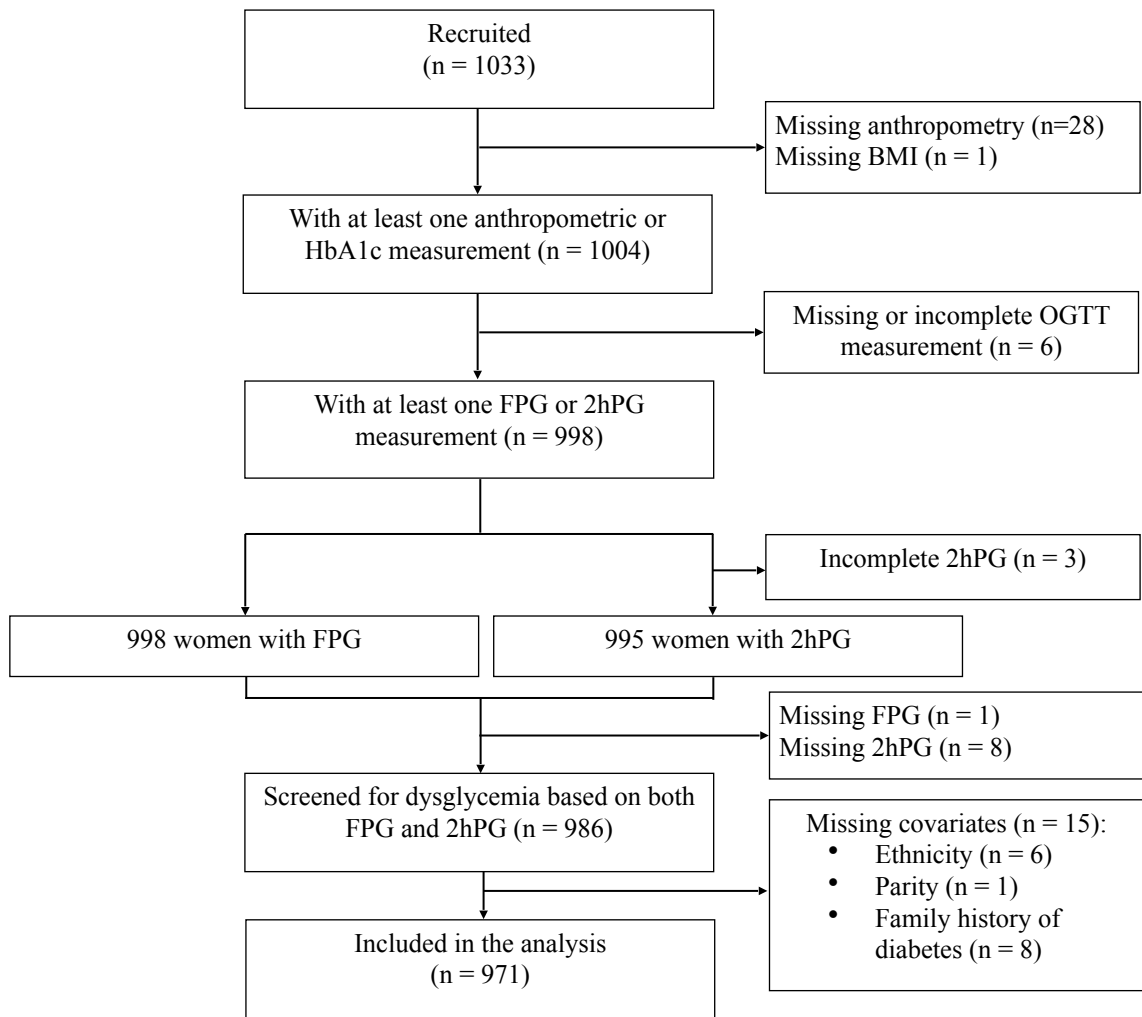

Figure S1: Study flowchart

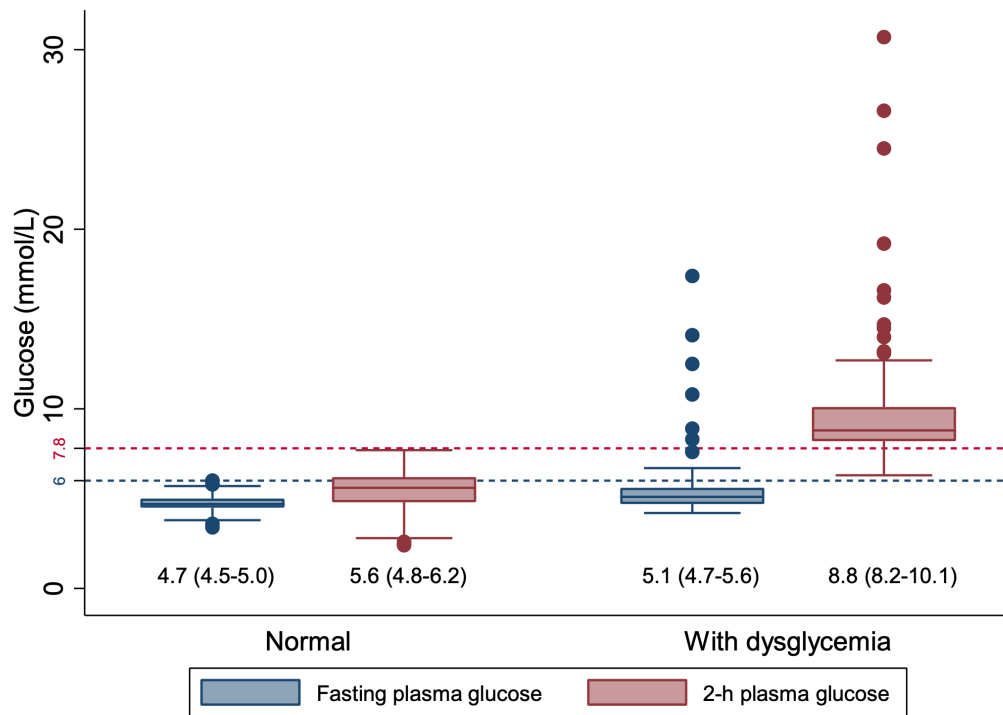

**Figure S2:** Boxplot distribution of fasting and 2h-glucose between women without (n=865) and with dysglycemia (n=106). Numbers below each boxplot represent median (interquartile range) values for fasting and 2-h plasma glucose (mmol/L). Blue dashed line: fasting glucose cut-point 6.0 mmol/L; red dashed line: 2-h plasma glucose cut-point 7.8 mmol/L.

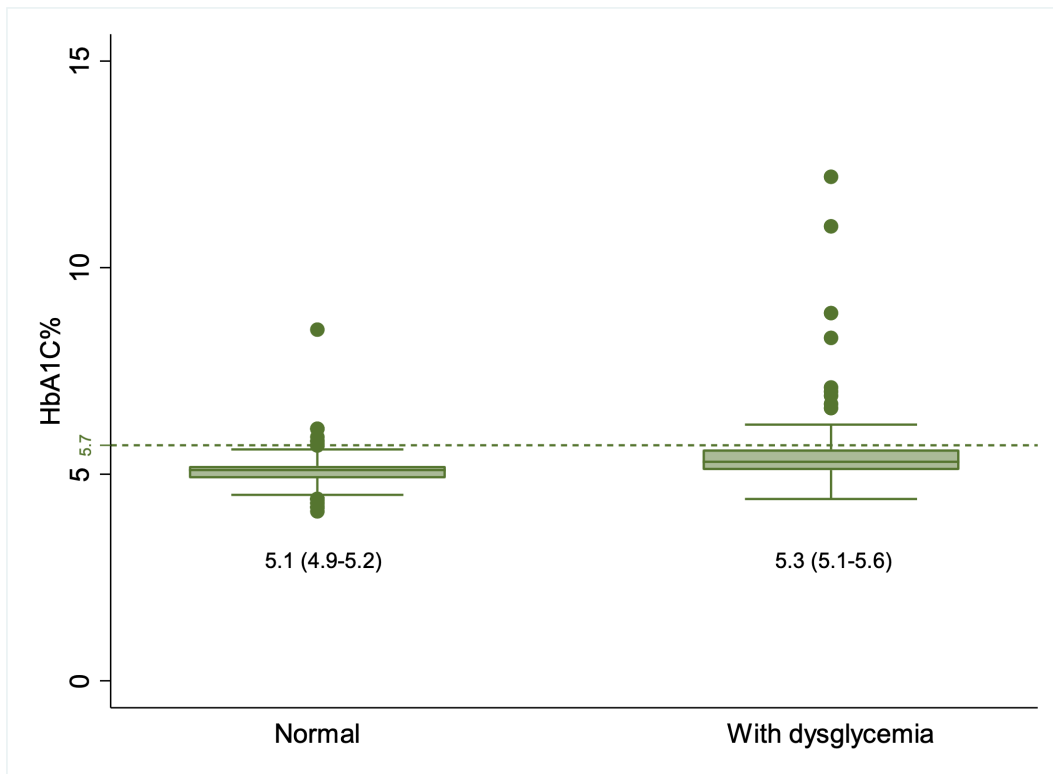

**Figure S3:** Boxplot distribution of HbA1c between women without (n=841) and with dysglycemia (n=105) women. Numbers below each boxplot represent median (interquartile range) values for HbA1c (%).

**Table S1:** Study inclusion and exclusion criteria

| <b>Inclusion criteria</b>                                                                                                           |
|-------------------------------------------------------------------------------------------------------------------------------------|
| Women aged 18-45 years                                                                                                              |
| Intention to reside in Singapore for the next 5 years                                                                               |
| Chinese, Malay, Indians, or a combination of these                                                                                  |
| Planning to conceive within 1 year                                                                                                  |
| Able to provide written, informed consent                                                                                           |
| <b>Exclusion criteria</b>                                                                                                           |
| Have been actively trying to conceive for more than 18 months                                                                       |
| Currently pregnant                                                                                                                  |
| Type 1 or Type 2 diabetes                                                                                                           |
| On fertility medication (e.g. hormones injection, IVF treatments) other than <i>Clomid / Letrozole (Femara)</i> in the past 1 month |
| Oral or implanted contraception, or with an IUCD in situ in the past 1 month                                                        |
| On systemic steroids in the past 1 month                                                                                            |
| On anticonvulsants in the past 1 month                                                                                              |
| On HIV or Hepatitis B or C treatment medication in the past 1 month                                                                 |
| Eventual multiple pregnancies                                                                                                       |

**Table S2:** Inter-observer technical error of measurement (TE) and coefficient of variation (CV) of anthropometry

|                              | <b>TE</b> | <b>CV (%)</b> |
|------------------------------|-----------|---------------|
| <b>Weight</b>                | 0.06 kg   | 0.13          |
| <b>Height</b>                | 0.50 cm   | 0.26          |
| <b>Waist circumference</b>   | 1.36 cm   | 2.20          |
| <b>Hip circumference</b>     | 1.56 cm   | 2.39          |
| <b>Triceps skinfolds</b>     | 0.49 mm   | 4.26          |
| <b>Biceps skinfolds</b>      | 0.52 mm   | 13.29         |
| <b>Subscapular skinfolds</b> | 1.27 mm   | 11.80         |
| <b>Suprailiac skinfolds</b>  | 1.63 mm   | 29.91         |

**Table S3:** Comparison of characteristics between included and excluded participants†

|                                        | Included<br>n=971 | Excluded<br>n=62 | p-value |
|----------------------------------------|-------------------|------------------|---------|
| <b><u>Demographics</u></b>             |                   |                  |         |
| Age (year)                             | 30.8 ± 3.7        | 31.2 ± 4.7       | 0.46    |
| <b>Ethnicity</b>                       |                   |                  |         |
| Chinese                                | 698 (71.9)        | 42 (80.8)        | 0.14    |
| Malay                                  | 153 (15.8)        | 2 (3.8)          |         |
| Indian                                 | 87 (8.9)          | 6 (11.5)         |         |
| Mixed                                  | 33 (3.4)          | 2 (3.9)          |         |
| <b>Educational level</b>               |                   |                  |         |
| No/Primary/Secondary                   | 114 (11.7)        | 11 (25.0)        | 0.01    |
| Post-secondary                         | 243 (25.0)        | 14 (31.8)        |         |
| Tertiary                               | 614 (63.2)        | 19 (43.2)        |         |
| <b>Smoking history</b>                 |                   |                  |         |
| Never                                  | 868 (89.4)        | 32 (88.8)        | 0.94    |
| Previous smoker                        | 60 (6.2)          | 2 (5.6)          |         |
| Current smoker                         | 43 (4.4)          | 2 (5.6)          |         |
| <b>Shiftwork‡</b>                      |                   |                  |         |
| No/Unemployed                          | 834 (85.9)        | 31 (83.8)        | 0.72    |
| Yes                                    | 137 (14.1)        | 6 (16.2)         |         |
| <b><u>Clinical characteristics</u></b> |                   |                  |         |
| <b>Menstrual cycle regularity</b>      |                   |                  |         |
| Regular                                | 629 (64.8)        | 24 (54.5)        | 0.17    |
| Irregular                              | 342 (35.2)        | 20 (45.5)        |         |
| <b>Parity</b>                          |                   |                  |         |
| Nulliparous                            | 627 (64.6)        | 28 (80.0)        | 0.66    |
| Primiparous                            | 262 (27.0)        | 5 (14.3)         |         |
| Multiparous                            | 82 (8.4)          | 2 (5.7)          |         |
| <b>Previous history of GDM§</b>        |                   |                  |         |
| No                                     | 466 (47.8)        | 14 (40.0)        | 0.36    |
| Yes                                    | 24 (2.5)          | 0 (0)            |         |

|                                   |            |           |      |
|-----------------------------------|------------|-----------|------|
| <b>Family history of diabetes</b> |            |           | 0.10 |
| No                                | 681 (70.1) | 15 (55.6) |      |
| Yes                               | 290 (29.9) | 12 (44.4) |      |
| <b>Glucose test</b>               |            |           |      |
| HbA1c                             | 5.1 ± 0.5  | 5.2 ± 0.5 | 0.29 |
| FPG                               | 4.8 ± 0.7  | 4.9 ± 1.0 | 0.47 |
| 2hPG                              | 6.0 ± 2.1  | 6.8 ± 3.4 | 0.10 |

† Values are means ± SD or *n* (%).

‡ Only for subjects who were employed.

§ Excluding nulliparous women

Sample sizes differ due to missing data.

P-values obtained by independent t-test (continuous) or chi-square analysis/ Fisher's exact test (categorical).

**Table S4:** Anthropometric measures of all women by glycemic status

|                                                   | All (%)†<br>(n=971) | Normal Glucose<br>Tolerance (n=865) | Dysglycemia<br>(n=106) | p-value |
|---------------------------------------------------|---------------------|-------------------------------------|------------------------|---------|
| <i><b>Anthropometric measures</b></i> §           |                     |                                     |                        |         |
| Weight (kg)                                       | 971 (100.0)         | 59.9 ± 13.1                         | 67.2 ± 16.1            | <0.01   |
| Height (m)                                        | 971 (100.0)         | 1.60 ± 0.55                         | 1.59 ± 0.57            | <0.01   |
| Waist circumference (cm)                          | 968 (99.7)          | 82.5 ± 11.4                         | 89.1 ± 12.8            | <0.01   |
| Hip circumference (cm)                            | 968 (99.7)          | 96.4 ± 9.8                          | 100.6 ± 11.5           | <0.01   |
| Triceps skinfolds (mm)                            | 969 (99.8)          | 22.8 ± 7.5                          | 27.2 ± 7.3             | <0.01   |
| Biceps skinfolds (mm)                             | 969 (99.8)          | 11.1 ± 5.6                          | 15.5 ± 7.5             | <0.01   |
| Subscapular skinfolds (mm)                        | 959 (98.8)          | 20.1 ± 7.8                          | 26.9 ± 9.0             | <0.01   |
| Supra-iliac skinfolds (mm)                        | 968 (99.7)          | 18.0 ± 7.4                          | 22.5 ± 7.7             | <0.01   |
| BMI (kg/m <sup>2</sup> )                          | 971 (100.0)         | 23.4 ± 5.0                          | 26.7 ± 6.2             | <0.01   |
| Waist-to-hip ratio                                | 967 (99.6)          | 0.85 ± 0.06                         | 0.89 ± 0.06            | <0.01   |
| Waist-to-height ratio                             | 968 (99.7)          | 0.52 ± 0.07                         | 0.56 ± 0.08            | <0.01   |
| ABSI¶                                             | 968 (99.7)          | 0.0802 ± 0.0053                     | 0.0799 ± 0.0046        | 0.58    |
| Peripheral (triceps + biceps) skinfolds (mm)      | 969 (99.8)          | 34.0 ± 11.7                         | 42.7 ± 13.8            | <0.01   |
| Truncal (subscapular + suprailiac) skinfolds (mm) | 958 (98.7)          | 38.0 ± 14.0                         | 49.3 ± 15.5            | <0.01   |
| Total skinfolds (mm)                              | 958 (98.7)          | 71.8 ± 24.3                         | 91.7 ± 27.6            | <0.01   |
| Subscapular-to-triceps ratio                      | 959 (98.8)          | 0.89 ± 0.23                         | 0.99 ± 0.22            | <0.01   |

† Total sample size (n) is not always 971 due to the missing values

§ Mean ± SD

¶ Rounded to four decimal places due to small values

ABSI, A Body Shape Index; BMI, body mass index



**Table S5:** Sensitivity analysis of categorical anthropometry and HbA1c – AUROC, sensitivity and specificity in detecting dysglycemia with adjustment for four commonly considered risk factors (age, ethnicity, previous GDM history, and family history of diabetes)

| Model | Variables                                                                                                                                           | n   | With history                       |                                 |                                 |
|-------|-----------------------------------------------------------------------------------------------------------------------------------------------------|-----|------------------------------------|---------------------------------|---------------------------------|
|       |                                                                                                                                                     |     | AUROC <sup>†</sup><br>(95% CI)     | Sensitivity <sup>‡</sup><br>(%) | Specificity <sup>‡</sup><br>(%) |
| 1     | History <sup>§</sup>                                                                                                                                | 971 | 0.59<br>(0.53-0.64) <sup>y</sup>   | 47.2                            | 65.6                            |
| 2     | HbA1c $\geq 5.7\%$                                                                                                                                  | 946 | 0.66<br>(0.60-0.72) <sup>ax</sup>  | 29.5                            | 96.3                            |
| 3     | BMI $\geq 23\text{kg/m}^2$                                                                                                                          | 971 | 0.68<br>(0.63-0.73) <sup>A</sup>   | 73.6                            | 57.1                            |
| 4     | WHtR $\geq 90^{\text{th}}$ percentile                                                                                                               | 968 | 0.61<br>(0.55-0.67) <sup>y</sup>   | 31.1                            | 81.1                            |
| 5     | Total skinfolds $\geq 90^{\text{th}}$ percentile                                                                                                    | 958 | 0.65<br>(0.59-0.71) <sup>a</sup>   | 33.3                            | 86.1                            |
| 6     | BMI $\geq 23\text{kg/m}^2$<br>+ WHtR $\geq 90^{\text{th}}$ percentile<br>+ Total skinfolds $\geq 90^{\text{th}}$ percentile                         | 957 | 0.71<br>(0.66-0.76) <sup>Ay</sup>  | 72.4                            | 58.8                            |
| 7     | BMI $\geq 23\text{kg/m}^2$<br>+ HbA1c $\geq 5.7\%$                                                                                                  | 946 | 0.73<br>(0.67-0.78) <sup>Axy</sup> | 63.8                            | 65.2                            |
| 8     | BMI $\geq 25\text{kg/m}^2$<br>+ HbA1c $\geq 5.7\%$                                                                                                  | 946 | 0.74<br>(0.69-0.80) <sup>Axy</sup> | 63.8                            | 74.3                            |
| 9     | BMI $\geq 23\text{kg/m}^2$<br>+ WHtR $\geq 90^{\text{th}}$ percentile<br>+ Total skinfolds $\geq 90^{\text{th}}$ percentile +<br>HbA1c $\geq 5.7\%$ | 932 | 0.75<br>(0.69-0.80) <sup>Axy</sup> | 64.4                            | 71.5                            |

<sup>†</sup> AUROC values were based on cases containing only complete data on all variables (n=932).

<sup>‡</sup> Sensitivity and specificity estimates were based on cases with available variables used to create each model.

<sup>§</sup> Age ( $>30$  years), ethnicity, GDM history, and family history of diabetes

<sup>a</sup>  $p < 0.05$ ; <sup>A</sup>  $p < 0.001$  vs Model 1 (history)

<sup>x</sup>  $p < 0.05$  vs Model 2 with history

<sup>y</sup>  $p < 0.05$  vs Model 3 with history

AUROC, area under receiver-operating characteristic; BMI, body mass index; HbA1c, glycated haemoglobin; WHtR, waist-to-height ratio

**Table S6:** Clinical utility of different strategies in detecting dysglycemia preconception among 922 women without previous history of GDM who provided both BMI and HbA1C measures (99 out of 922 women with a HbA1c measure had dysglycemia)

|                                                                                                                               | Positive predictive value (%) | Negative predictive value (%) | Number to proceed to OGTT (% of all screened) | Number of dysglycemia identified (% of all dysglycemia) | Number of dysglycemia cases missed (% of all dysglycemia) |
|-------------------------------------------------------------------------------------------------------------------------------|-------------------------------|-------------------------------|-----------------------------------------------|---------------------------------------------------------|-----------------------------------------------------------|
| 1. HbA1c $\geq$ 5.7%                                                                                                          | 65.8                          | 91.6                          | 38 (4.1%)                                     | 25 (25.3%)                                              | 74 (74.7%)                                                |
| 2. BMI $\geq$ 23kg/m <sup>2</sup> + HbA1c $\geq$ 5.7%                                                                         | 17.2                          | 94.6                          | 418 (46.0%)                                   | 72 (72.7%)                                              | 27 (27.3%)                                                |
| 3. BMI $\geq$ 23kg/m <sup>2</sup> + WHtR $\geq$ 90th percentile + Total skinfolds $\geq$ 90th percentile + HbA1c $\geq$ 5.7%† | 17.9                          | 94.3                          | 380 (41.8%)                                   | 68 (69.4%)                                              | 30 (30.6%)                                                |
| 4. BMI $\geq$ 25kg/m <sup>2</sup> + HbA1c $\geq$ 5.7%                                                                         | 22.9                          | 94.2                          | 266 (28.9%)                                   | 61 (61.6%)                                              | 38 (38.4%)                                                |
| 5. BMI $\geq$ 23kg/m <sup>2</sup> + HbA1c $\geq$ 5.7% + History‡                                                              | 21.1                          | 93.7                          | 275 (29.8%)                                   | 58 (58.6%)                                              | 41 (41.4%)                                                |

† n=909 provided all measurements (98 out of 909 women with dysglycemia).

‡ History variables included: Age (>30 years), ethnicity, educational level, smoking history, shift work, menstrual cycle regularity, parity, and family history of diabetes.

**Table S7:** Different thresholds of anthropometry and HbA1c for screening dysglycemia

|                                   | Without history   |                 |                 | With history†     |                 |                 |
|-----------------------------------|-------------------|-----------------|-----------------|-------------------|-----------------|-----------------|
|                                   | AUROC (95% CI)    | Sensitivity (%) | Specificity (%) | AUROC (95% CI)    | Sensitivity (%) | Specificity (%) |
| <b>BMI (kg/m<sup>2</sup>)</b>     |                   |                 |                 |                   |                 |                 |
| <b>0.5 unit increment</b>         |                   |                 |                 |                   |                 |                 |
| ≥27.5                             | 0.624 (0.58-0.67) | 40.6            | 84.3            | 0.702 (0.65-0.76) | 58.5            | 70.6            |
| ≥27                               | 0.631 (0.58-0.68) | 43.4            | 82.8            | 0.706 (0.65-0.76) | 61.3            | 69.5            |
| ≥26.5                             | 0.646 (0.60-0.70) | 48.1            | 81.2            | 0.715 (0.66-0.77) | 65.1            | 70.9            |
| ≥26                               | 0.653 (0.60-0.70) | 51.9            | 78.6            | 0.719 (0.67-0.77) | 67.9            | 69.7            |
| ≥25.5                             | 0.667 (0.62-0.72) | 56.6            | 76.9            | 0.721 (0.67-0.78) | 64.2            | 73.1            |
| ≥25                               | 0.672 (0.62-0.72) | 59.4            | 75.0            | 0.727 (0.67-0.78) | 63.2            | 72.4            |
| ≥24.5                             | 0.656 (0.61-0.70) | 59.4            | 71.7            | 0.719 (0.67-0.77) | 65.1            | 68.7            |
| ≥24                               | 0.667 (0.62-0.71) | 66.0            | 67.3            | 0.719 (0.67-0.77) | 67.9            | 66.0            |
| ≥23.5                             | 0.668 (0.62-0.71) | 69.8            | 63.8            | 0.724 (0.67-0.78) | 71.7            | 63.4            |
| ≥23                               | 0.648 (0.60-0.69) | 71.7            | 57.9            | 0.707 (0.65-0.76) | 67.9            | 68.7            |
| <b>0.1 unit increment</b>         |                   |                 |                 |                   |                 |                 |
| ≥24.0                             | 0.667 (0.62-0.71) | 66.0            | 67.3            | 0.719 (0.67-0.77) | 67.9            | 66.0            |
| ≥23.9                             | 0.670 (0.62-0.72) | 67.0            | 66.9            | 0.723 (0.67-0.78) | 68.9            | 65.6            |
| ≥23.8                             | 0.671 (0.62-0.72) | 67.9            | 66.2            | 0.726 (0.67-0.78) | 69.8            | 64.9            |
| ≥23.7                             | 0.673 (0.63-0.72) | 68.9            | 65.8            | 0.729 (0.68-0.78) | 70.8            | 64.5            |
| ≥23.6                             | 0.670 (0.62-0.72) | 68.9            | 65.2            | 0.728 (0.68-0.78) | 70.8            | 64.3            |
| ≥23.5                             | 0.668 (0.62-0.71) | 69.8            | 63.8            | 0.724 (0.67-0.78) | 71.7            | 63.4            |
| ≥23.4                             | 0.665 (0.62-0.71) | 70.8            | 62.3            | 0.722 (0.67-0.77) | 72.6            | 62.4            |
| ≥23.3                             | 0.664 (0.62-0.71) | 71.7            | 61.2            | 0.721 (0.67-0.77) | 72.6            | 61.9            |
| ≥23.2                             | 0.657 (0.61-0.7)  | 71.7            | 59.8            | 0.713 (0.66-0.77) | 69.8            | 62.9            |
| ≥23.1                             | 0.652 (0.61-0.7)  | 71.7            | 58.7            | 0.709 (0.65-0.76) | 67.9            | 66.7            |
| ≥23.0                             | 0.648 (0.6-0.69)  | 71.7            | 57.9            | 0.707 (0.65-0.76) | 67.9            | 68.7            |
| <b>WHtR percentile</b>            |                   |                 |                 |                   |                 |                 |
| ≥99                               | 0.525 (0.50-0.55) | 1.9             | 99.2            | 0.653 (0.60-0.71) | 55.7            | 66.8            |
| ≥95                               | 0.566 (0.53-0.61) | 9.4             | 95.5            | 0.654 (0.60-0.71) | 53.8            | 66.9            |
| <b>Total Skinfolds percentile</b> |                   |                 |                 |                   |                 |                 |
| ≥99                               | 0.563 (0.53-0.60) | 2.9             | 99.3            | 0.656 (0.60-0.71) | 55.2            | 66.6            |
| ≥95                               | 0.511 (0.49-0.53) | 16.2            | 96.4            | 0.674 (0.62-0.73) | 49.5            | 74.0            |
| <b>HbA1c (%)</b>                  |                   |                 |                 |                   |                 |                 |
| ≥5.6                              | 0.632 (0.59-0.68) | 29.5            | 96.9            | 0.720 (0.66-0.78) | 53.3            | 78.8            |
| ≥5.5                              | 0.651 (0.60-0.70) | 36.2            | 94.1            | 0.728 (0.67-0.79) | 56.2            | 78.6            |
| ≥5.4                              | 0.684 (0.63-0.73) | 48.6            | 88.2            | 0.753 (0.70-0.81) | 59.1            | 82.1            |
| ≥5.3                              | 0.701 (0.65-0.75) | 61.0            | 79.3            | 0.763 (0.71-0.81) | 68.6            | 75.9            |
| ≥5.2                              | 0.695 (0.65-0.74) | 74.3            | 64.7            | 0.755 (0.71-0.80) | 77.1            | 63.9            |
| ≥5.1                              | 0.656 (0.62-0.69) | 84.8            | 46.5            | 0.728 (0.68-0.77) | 73.3            | 61.9            |

|            |                   |      |      |                   |      |      |
|------------|-------------------|------|------|-------------------|------|------|
| $\geq 5.0$ | 0.581 (0.55-0.61) | 89.5 | 26.8 | 0.687 (0.64-0.74) | 66.7 | 59.3 |
|------------|-------------------|------|------|-------------------|------|------|

---

†Age (>30 years), ethnicity, educational level, smoking history, shift work, menstrual cycle regularity, parity, GDM history, and family history of diabetes. AUROC, area under receiver-operating characteristic; BMI, body mass index; HbA1c, glycated hemoglobin; WHtR, waist-to-height ratio

**Table S8:** Sensitivity analyses performed using different BMI ( $\geq 23.7$  and  $\geq 27.5$  kg/m<sup>2</sup>) and HbA1c cut-offs ( $\geq 5.3$  and  $\geq 6.0\%$ ) in detecting dysglycemia

| Model                                              |                                                                                                                                                   | Without history                 |                 |                 | With history                   |                 |                 |
|----------------------------------------------------|---------------------------------------------------------------------------------------------------------------------------------------------------|---------------------------------|-----------------|-----------------|--------------------------------|-----------------|-----------------|
|                                                    |                                                                                                                                                   | AUROC (95% CI)                  | Sensitivity (%) | Specificity (%) | AUROC (95% CI)                 | Sensitivity (%) | Specificity (%) |
| 1                                                  | History <sup>†</sup>                                                                                                                              | -                               | -               | -               | 0.65 (0.60-0.71)               | 55.7            | 67.3            |
| <b>BMI <math>\geq 23.7</math> kg/m<sup>2</sup></b> |                                                                                                                                                   |                                 |                 |                 |                                |                 |                 |
| 2                                                  | BMI $\geq 23.7$ kg/m <sup>2</sup>                                                                                                                 | 0.68 (0.63-0.72) <sup>z</sup>   | 68.9            | 65.8            | 0.73 (0.68-0.78) <sup>a</sup>  | 70.8            | 64.5            |
| <b>BMI <math>\geq 27.5</math> kg/m<sup>2</sup></b> |                                                                                                                                                   |                                 |                 |                 |                                |                 |                 |
| 3                                                  | BMI $\geq 27.5$ kg/m <sup>2</sup>                                                                                                                 | 0.63 (0.58-0.68) <sup>z</sup>   | 40.6            | 84.3            | 0.70 (0.65-0.76) <sup>a</sup>  | 58.5            | 70.6            |
| 4                                                  | BMI $\geq 27.5$ kg/m <sup>2</sup> + WHtR $\geq 90^{\text{th}}$ percentile + Total skinfolds $\geq 90^{\text{th}}$ percentile                      | 0.64 (0.59-0.69) <sup>z</sup>   | 41.9            | 83.9            | 0.71 (0.66-0.76) <sup>a</sup>  | 58.1            | 72.1            |
| 5                                                  | BMI $\geq 27.5$ kg/m <sup>2</sup> + HbA1c $\geq 5.7\%$                                                                                            | 0.67 (0.62-0.73) <sup>bz</sup>  | 47.6            | 83.9            | 0.74 (0.68-0.79) <sup>aw</sup> | 55.2            | 77.1            |
| 6                                                  | BMI $\geq 27.5$ kg/m <sup>2</sup> + Total skinfolds $\geq 90^{\text{th}}$ + WHtR $\geq 90^{\text{th}}$ percentile + HbA1c $\geq 5.7\%$            | 0.68 (0.63-0.74) <sup>bz</sup>  | 46.2            | 86.1            | 0.73 (0.68-0.79) <sup>aw</sup> | 53.9            | 79.8            |
| <b>HbA1c <math>\geq 5.3\%</math></b>               |                                                                                                                                                   |                                 |                 |                 |                                |                 |                 |
| 7                                                  | HbA1c $\geq 5.3\%$                                                                                                                                | 0.70 (0.65-0.75) <sup>z</sup>   | 61.0            | 79.3            | 0.76 (0.71-0.81) <sup>a</sup>  | 68.6            | 76.0            |
| 8                                                  | BMI $\geq 23$ kg/m <sup>2</sup> + HbA1c $\geq 5.3\%$                                                                                              | 0.74 (0.69-0.79) <sup>acz</sup> | 61.0            | 79.3            | 0.77 (0.73-0.82) <sup>a</sup>  | 67.6            | 75.7            |
| 9                                                  | BMI $\geq 23.7$ kg/m <sup>2</sup> + HbA1c $\geq 5.3\%$                                                                                            | 0.75 (0.69-0.8) <sup>acz</sup>  | 61.0            | 79.3            | 0.78 (0.73-0.83) <sup>a</sup>  | 66.7            | 74.9            |
| 10                                                 | BMI $\geq 23.7$ kg/m <sup>2</sup> + WHtR $\geq 90^{\text{th}}$ percentile + Total skinfolds $\geq 90^{\text{th}}$ percentile + HbA1c $\geq 5.3\%$ | 0.75 (0.70-0.81) <sup>acz</sup> | 65.4            | 75.7            | 0.78 (0.73-0.83) <sup>a</sup>  | 69.2            | 75.7            |
| <b>HbA1c <math>\geq 6.0\%</math></b>               |                                                                                                                                                   |                                 |                 |                 |                                |                 |                 |
| 11                                                 | HbA1c $\geq 6.0\%$                                                                                                                                | 0.58 (0.54-0.62) <sup>az</sup>  | 17.1            | 99.6            | 0.69 (0.64-0.75) <sup>a</sup>  | 52.4            | 75.3            |
| 12                                                 | BMI $\geq 23$ kg/m <sup>2</sup> + HbA1c $\geq 6.0\%$                                                                                              | 0.69 (0.63-0.74) <sup>dz</sup>  | 72.4            | 57.9            | 0.74 (0.69-0.80) <sup>ay</sup> | 61              | 73.4            |
| 13                                                 | BMI $\geq 23$ kg/m <sup>2</sup> + WHtR $\geq 90^{\text{th}}$ percentile + Total skinfolds $\geq 90^{\text{th}}$ percentile + HbA1c $\geq 6.0\%$   | 0.70 (0.64-0.75) <sup>dz</sup>  | 72.1            | 58.5            | 0.74 (0.69-0.80) <sup>ay</sup> | 60.6            | 73              |

<sup>†</sup> Age (>30 years), ethnicity, educational level, smoking history, shift work, menstrual cycle regularity, parity, GDM history, and family history of diabetes

<sup>a</sup> p<0.05 vs Model 1 (history)

<sup>b</sup> p<0.05 vs Model 3 without history (across Model 3 – 6)

<sup>c</sup> p<0.05 vs Model 7 without history (across Model 7 –10)

<sup>d</sup> p<0.05 vs Model 11 without history (across Model 11 –13)

<sup>w</sup> p<0.05 vs Model 3 with history (across Model 3 – 6)

<sup>x</sup> p<0.05 vs Model 7 with history (across Model 7 –10)

<sup>y</sup> p<0.05 vs Model 11 with clinical history (across Model 11 –13)

<sup>z</sup> p<0.05 vs with history

AUROC, area under receiver-operating characteristic; BMI, body mass index; HbA1c, glycated hemoglobin; WHtR, waist-to-height ratio
